# Supplementary figures and images for: A Comparative Study of Serum Angiogenic Biomarkers in Cirrhosis and Hepatocellular Carcinoma
Source: MDPI journal article supplement (doi:10.3390/cancers14010011), 2021-12-21

Supplementary Information

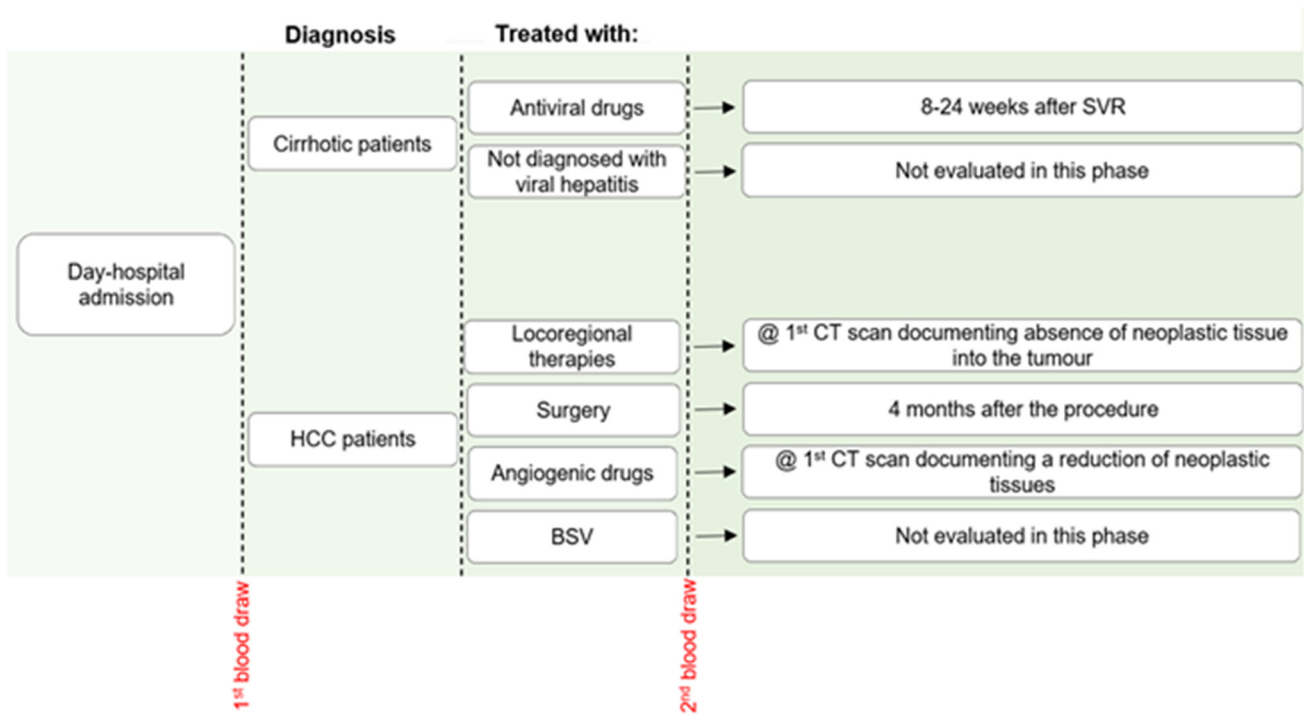

Figure S1. schematic workflow.

Supplement: s1 [file s1]
